# Supplementary material for: Application of a bivalent “click” approach to target tyrosyl-DNA phosphodiesterase 1 (TDP1)
Source: Royal Society of Chemistry journal article supplement (doi:10.1039/d4md00824c), 2025-01-01

## Supplementary Information

### Application of a bivalent “click” approach to target tyrosyl-DNA phosphodiesterase 1 (TDP1)

Xue Zhi Zhao,<sup>1\*</sup> Wenjie Wang,<sup>2</sup> Md Rasel Al Mahmud,<sup>2</sup> Keli Agama,<sup>2</sup> Yves Pommier<sup>2</sup> and  
Terrence R. Burke, Jr.<sup>1</sup>

<sup>1</sup>Chemical Biology Laboratory, Center for Cancer Research, National Cancer Institute,  
Frederick, MD, U.S.A.

<sup>2</sup>Developmental Therapeutics Branch & Laboratory of Molecular Pharmacology, Center for  
Cancer Research, National Cancer Institute, Bethesda, MD, U.S.A.

Corresponding author\* : [xuezhi.zhao@nih.gov](mailto:xuezhi.zhao@nih.gov)

## Table of Contents

| Contents                                                                                           | Page |
|----------------------------------------------------------------------------------------------------|------|
| I. Table S1 Structures of bivalent analogs <b>4a – d</b> and <b>5a – j</b> .....                   | S3   |
| II. Table S2 Cytotoxicity of compounds in cellular assay using MCF7 and HCT116 cell lines<br>..... | S5   |
| III. <sup>1</sup> H NMR Spectra of compounds <b>4a – d</b> and <b>5a – j</b> .....                 | S6   |
| IV. HRMS of compounds <b>4a – d</b> and <b>5a – j</b> .....                                        | S14  |

I. Table S1. Structures of bivalent analogs **4a-4d** and **5a-5j**.

| Compound  | Structures <sup>i</sup>                                                              |
|-----------|--------------------------------------------------------------------------------------|
| <b>4a</b> | 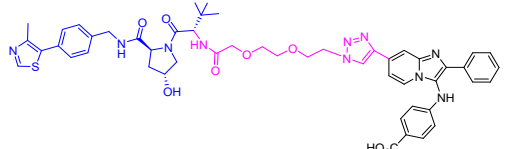   |
| <b>4b</b> |    |
| <b>4c</b> |    |
| <b>4d</b> |    |
| <b>5a</b> |   |
| <b>5b</b> |  |
| <b>5c</b> |  |
| <b>5d</b> |  |
| <b>5e</b> |  |

|    |                                                                                    |
|----|------------------------------------------------------------------------------------|
| 5f | 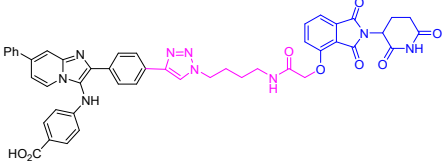 |
| 5g |  |
| 5h |  |
| 5i |  |
| 5j |  |

Note: TDP1 binders are in black, ligase recruiters are in blue and linker components are in purple.

**Table S2.** Cytotoxicity of compounds in cellular assays using MCF7 and HCT116 cell lines.

| <b>Compound</b> | <b>CC<sub>50</sub> (μM, MCF7)</b> | <b>CC<sub>50</sub> (μM, HCT116)</b> |
|-----------------|-----------------------------------|-------------------------------------|
| <b>1b</b>       | 110                               | 50                                  |
| <b>5a</b>       | 74                                | 152                                 |
| <b>5h</b>       | 105                               | 193                                 |
| <b>5i</b>       | 129                               | 190                                 |
| <b>5j</b>       | 108                               | 151                                 |

### III. <sup>1</sup>H NMR Spectra of Compounds 4a – c and 5a – j.

Compound 4a, <sup>1</sup>H NMR, 500 MHz, DMSO-d<sub>6</sub>

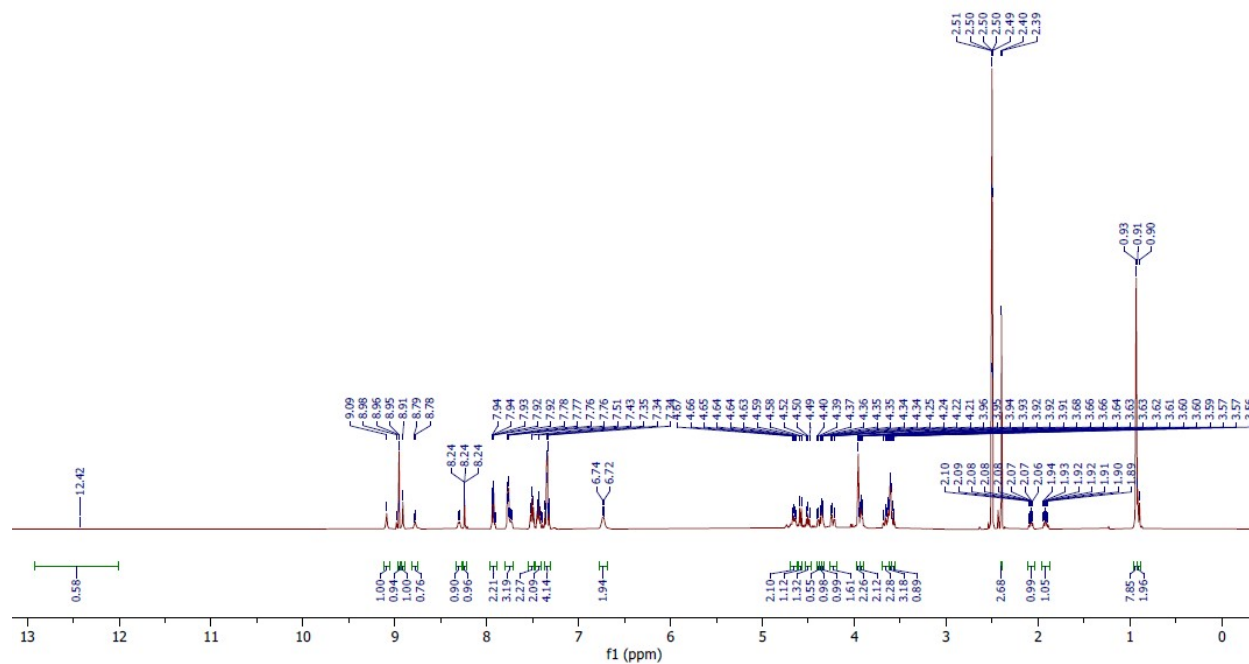

Compound 4b, <sup>1</sup>H NMR, 500 MHz, DMSO-d<sub>6</sub>

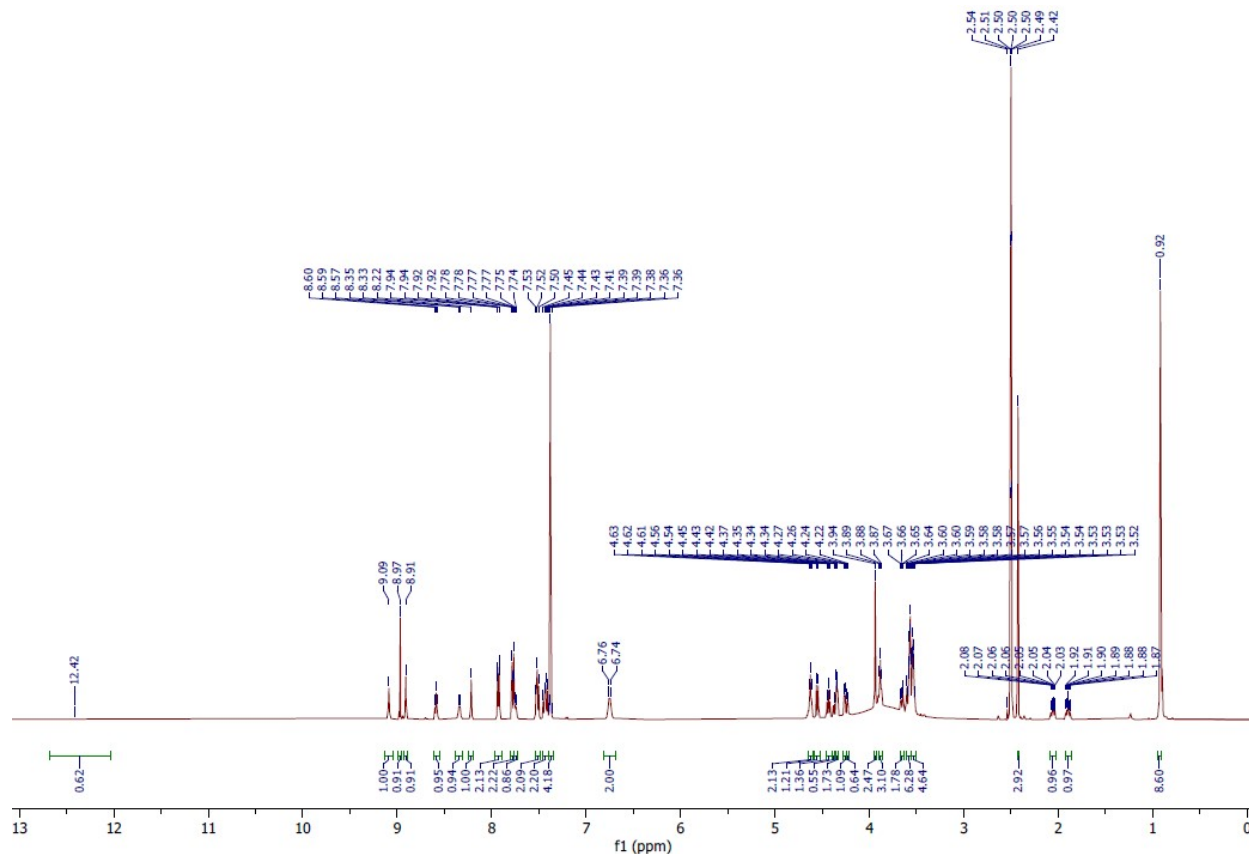

Compound 4c, <sup>1</sup>H NMR, 500 MHz, DMSO-d<sub>6</sub>

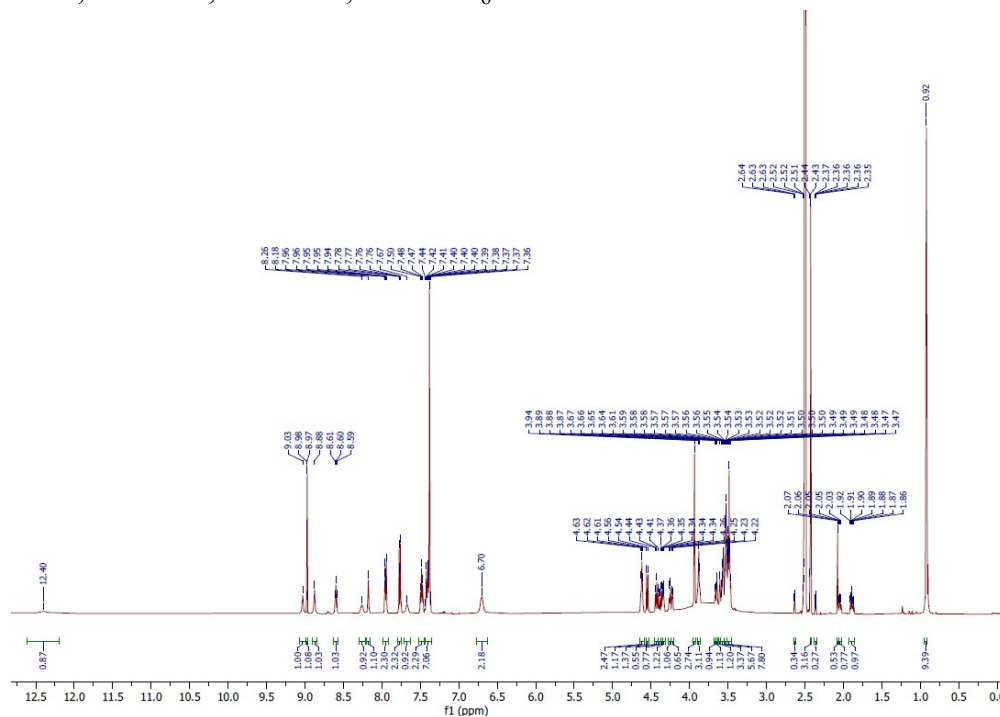

Compound 4d, <sup>1</sup>H NMR, 500 MHz, DMSO-d<sub>6</sub>

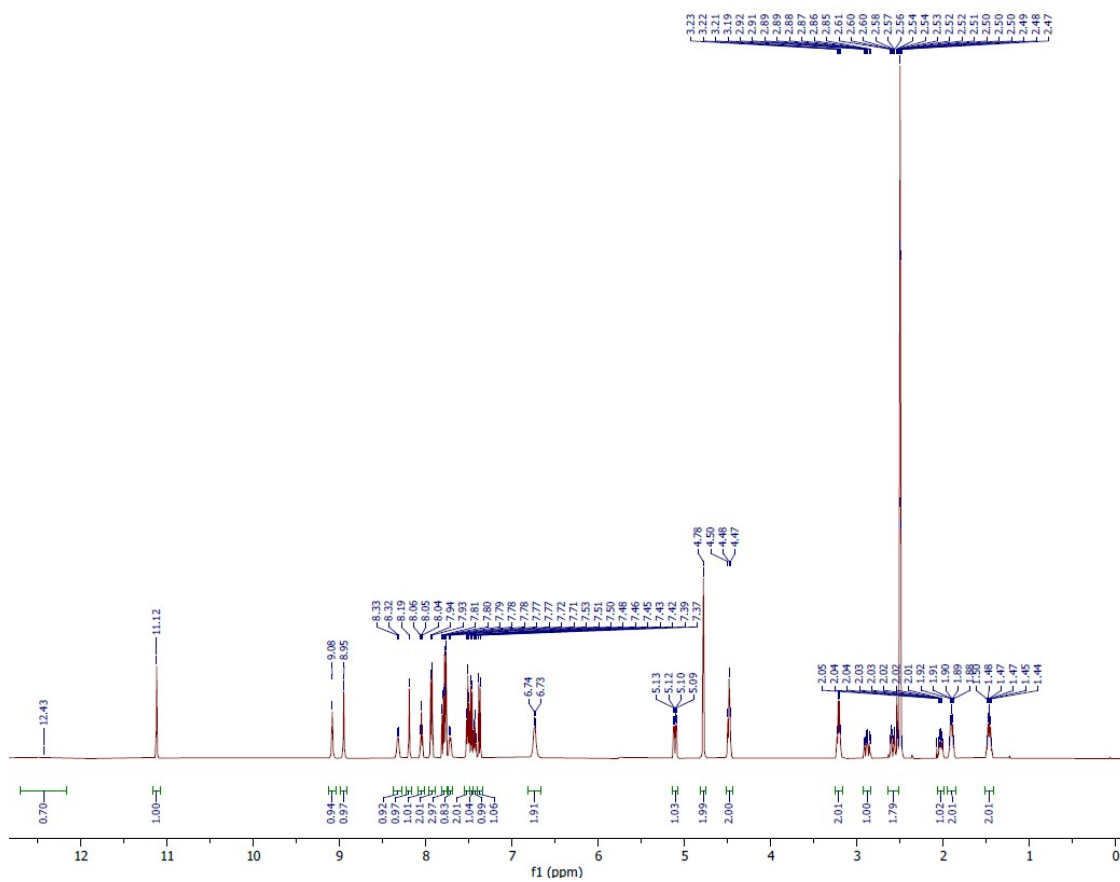

Compound 5a, <sup>1</sup>H NMR, 500 MHz, DMSO-d<sub>6</sub>

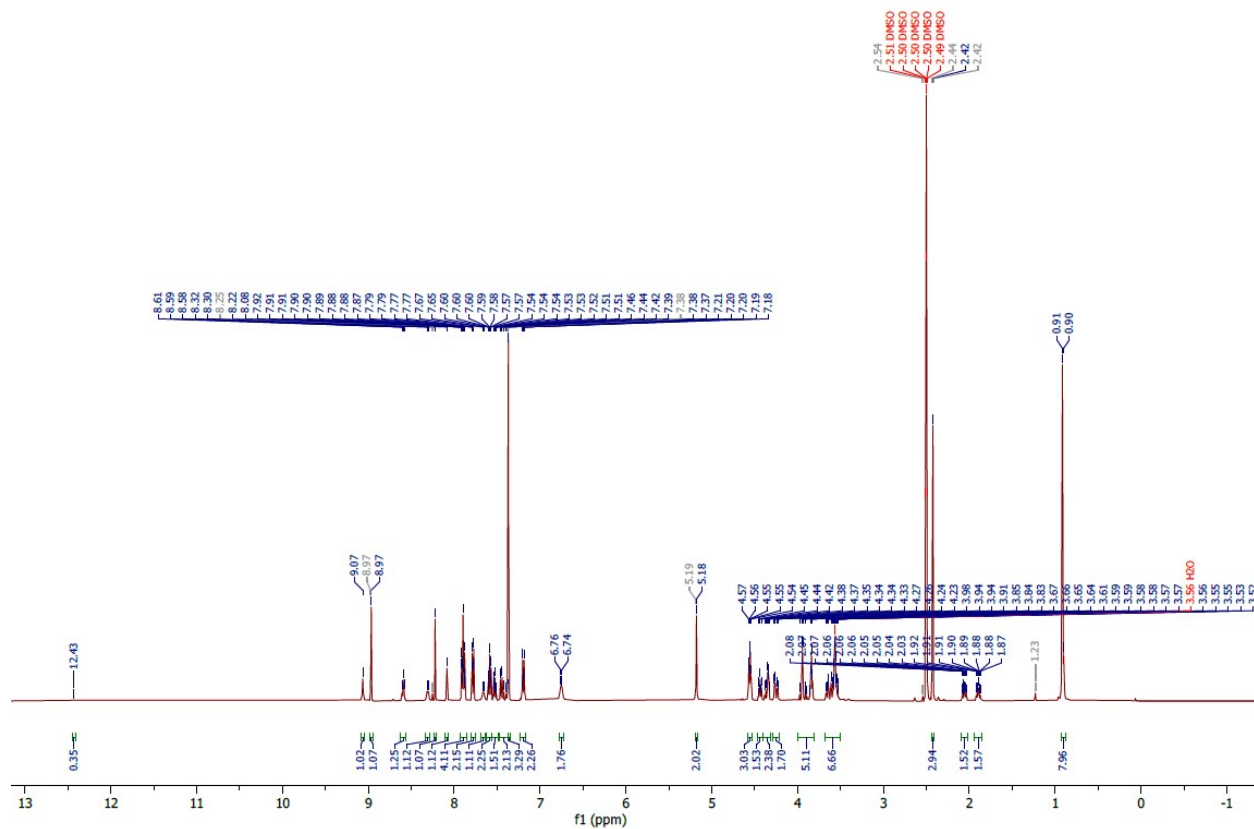

Compound 5b, <sup>1</sup>H NMR, 500 MHz, DMSO-d<sub>6</sub>

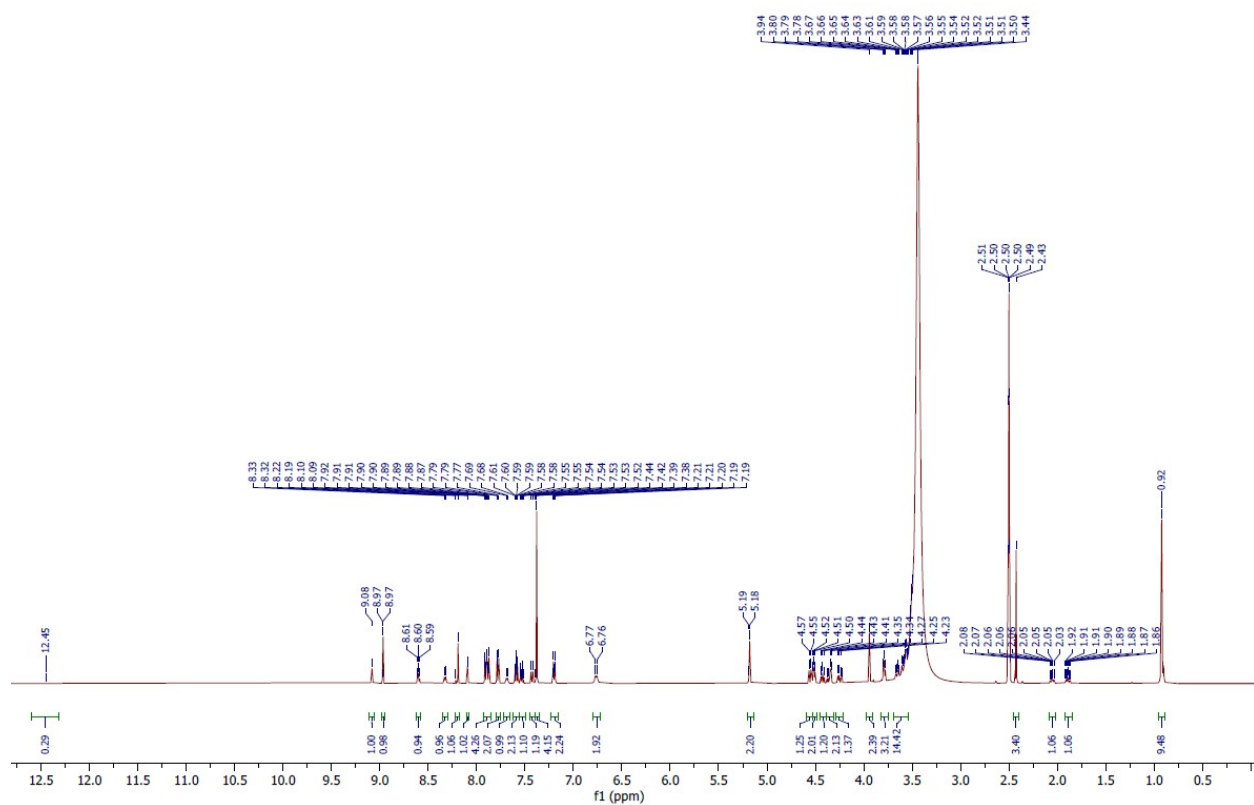



Compound 5c, <sup>1</sup>H NMR, 500 MHz, DMSO-d<sub>6</sub>

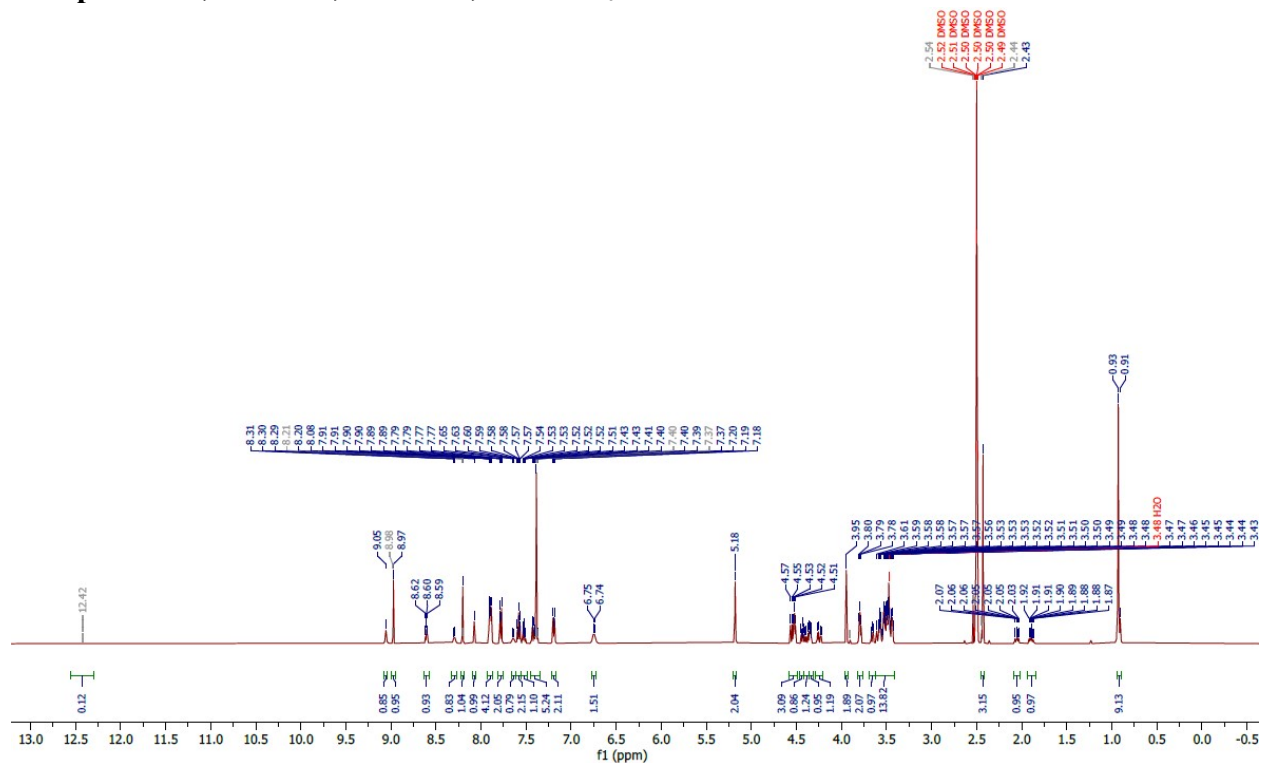

Compound 5d, <sup>1</sup>H NMR, 500 MHz, DMSO-d<sub>6</sub>

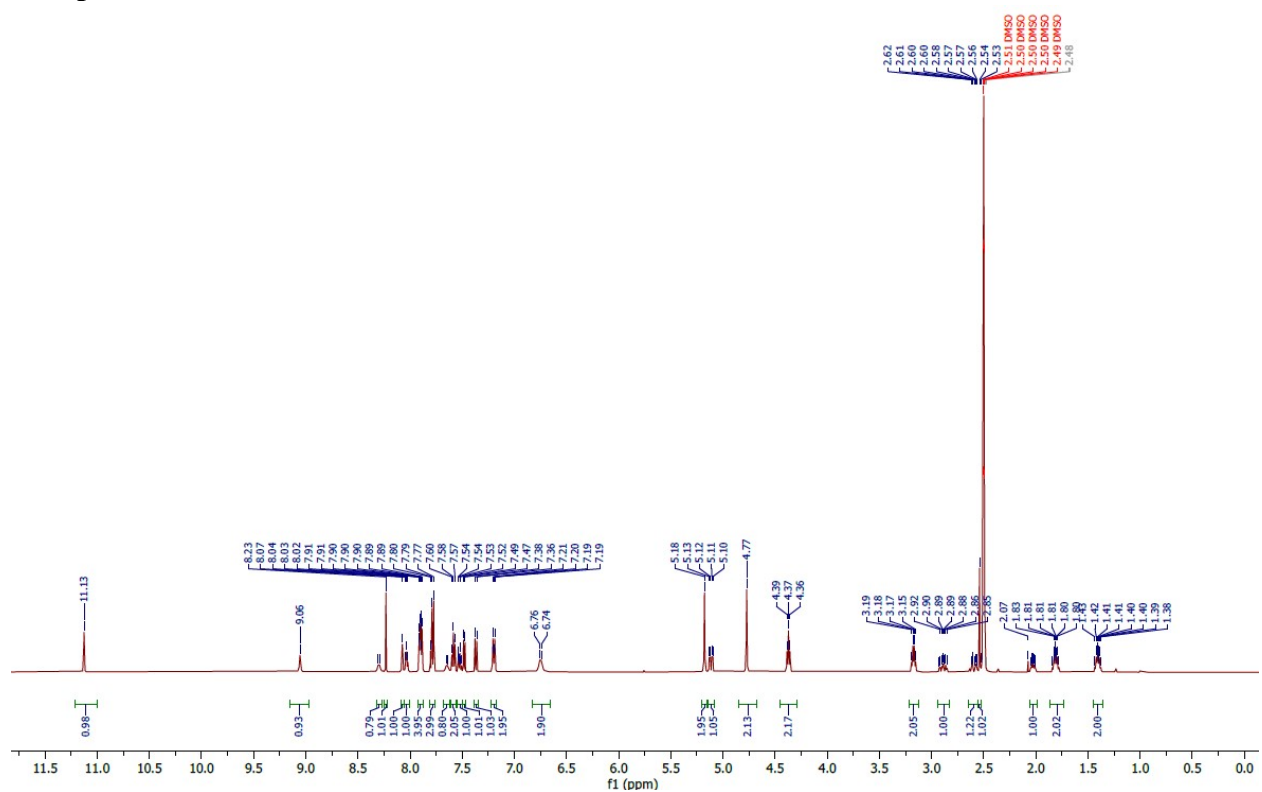

Compound 5e, <sup>1</sup>H NMR, 500 MHz, DMSO-d<sub>6</sub>

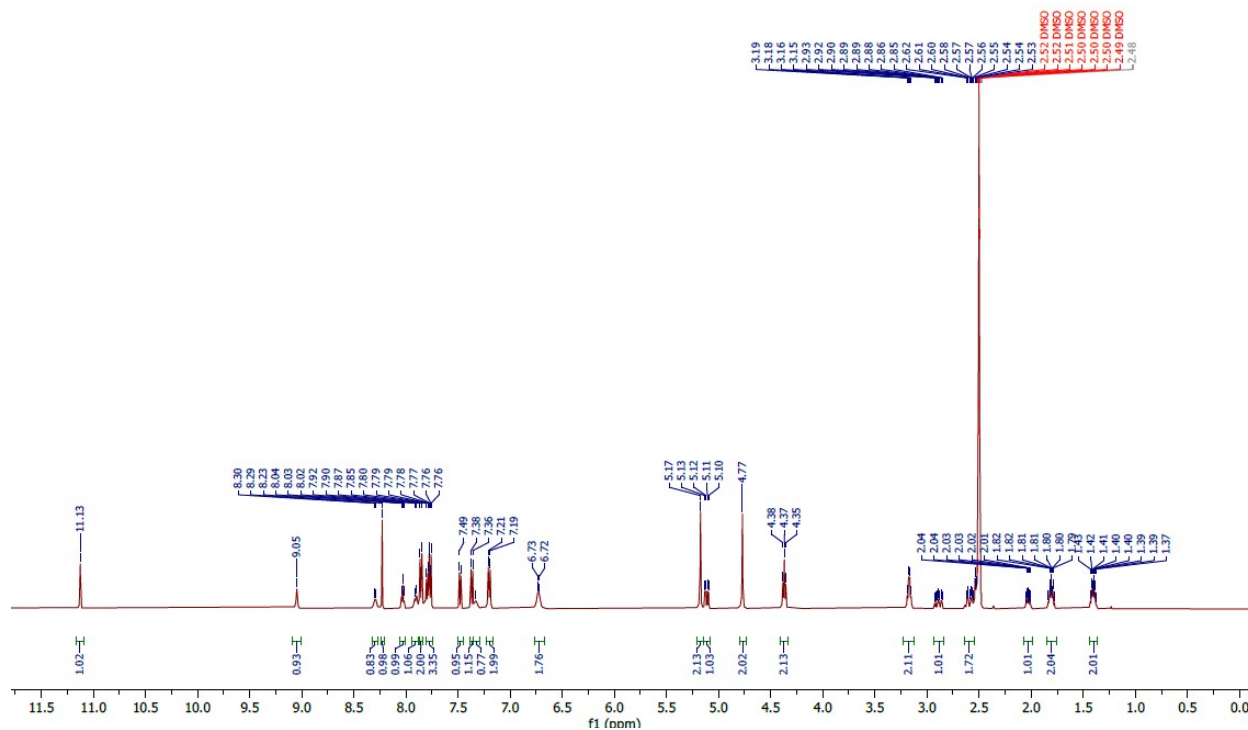

Compound 5f, <sup>1</sup>H NMR, 500 MHz, DMSO-d<sub>6</sub>

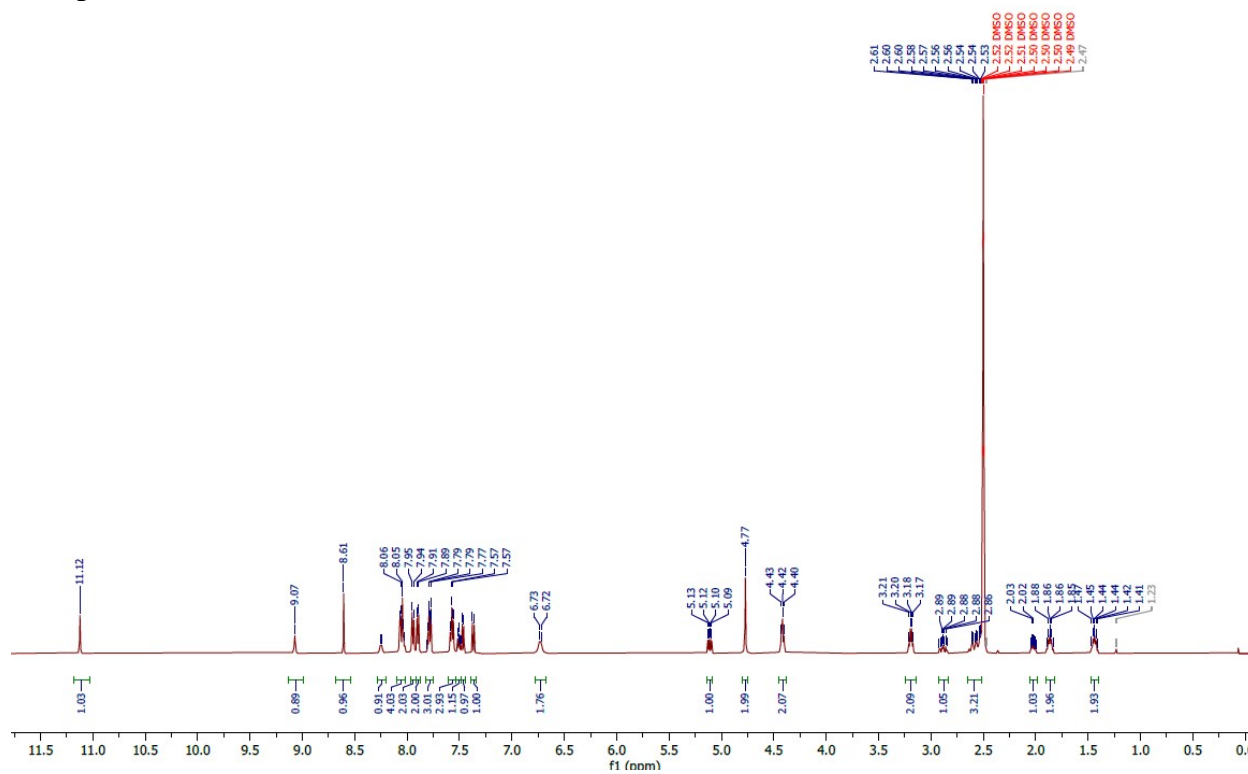





#### IV. HRMS of Compounds 4a – d and 5a – j.

##### Compound 4a

HRMS (ESI)  $m/z$  calcd. for  $C_{50}H_{55}N_{10}O_8S$  ( $MH^+$ ), 955.3920; found, 955.3918. ( $\Delta = 0.2$  ppm).

HRMS (ESI)  $m/z$  calcd. for  $C_{50}H_{56}N_{10}O_8S$  ( $MH_2$ ) $^{2+}$ , 478.1996; found, 478.1990. ( $\Delta = 1.3$  ppm).

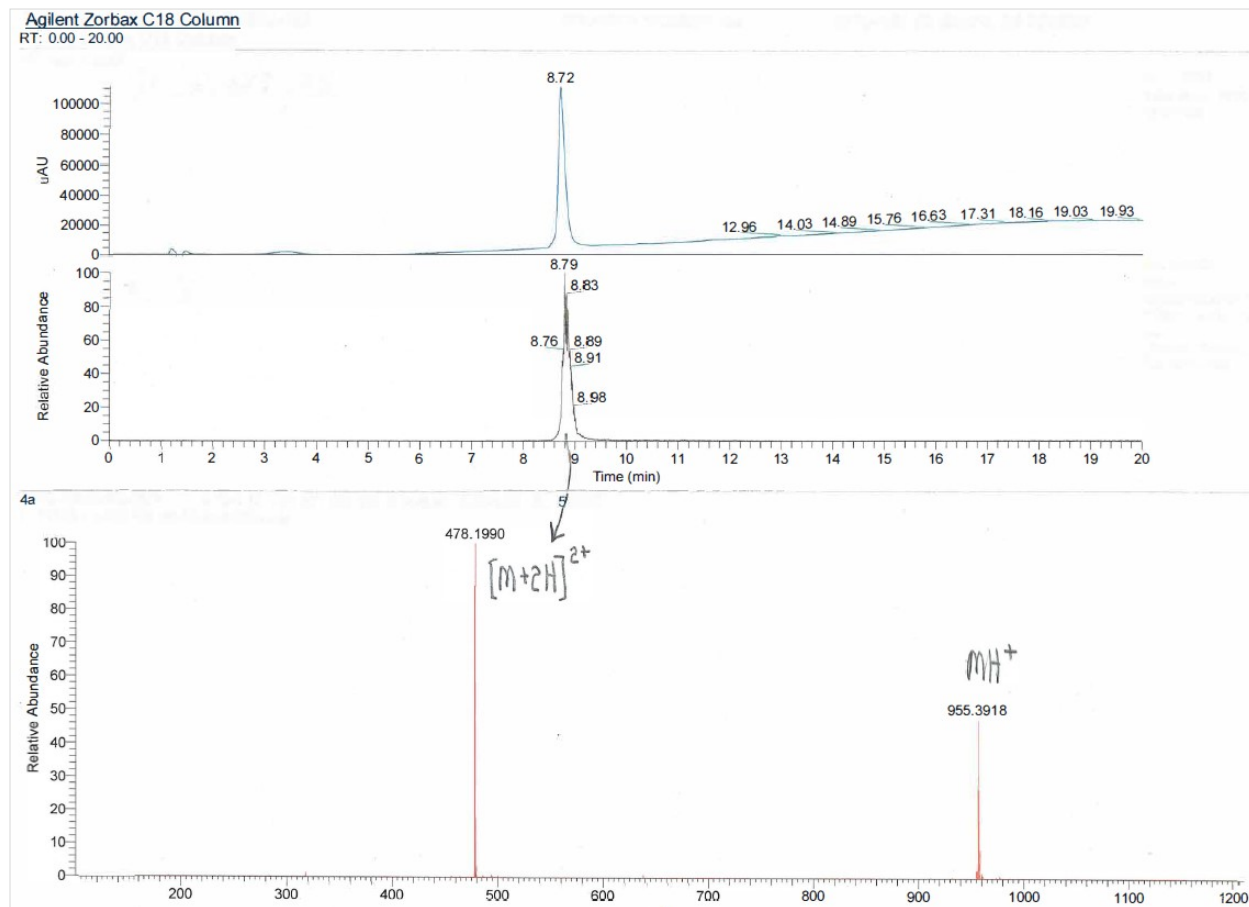

## Compound 4b

HRMS (ESI)  $m/z$  calcd. for  $C_{52}H_{59}N_{10}O_9S$  ( $MH^+$ ), 999.4182; found, 999.4167. ( $\Delta = 1.5$  ppm).

HRMS (ESI)  $m/z$  calcd. for  $C_{52}H_{60}N_{10}O_9S$  ( $MH_2$ ) $^{2+}$ , 500.2127; found, 500.2114. ( $\Delta = 2.6$  ppm).

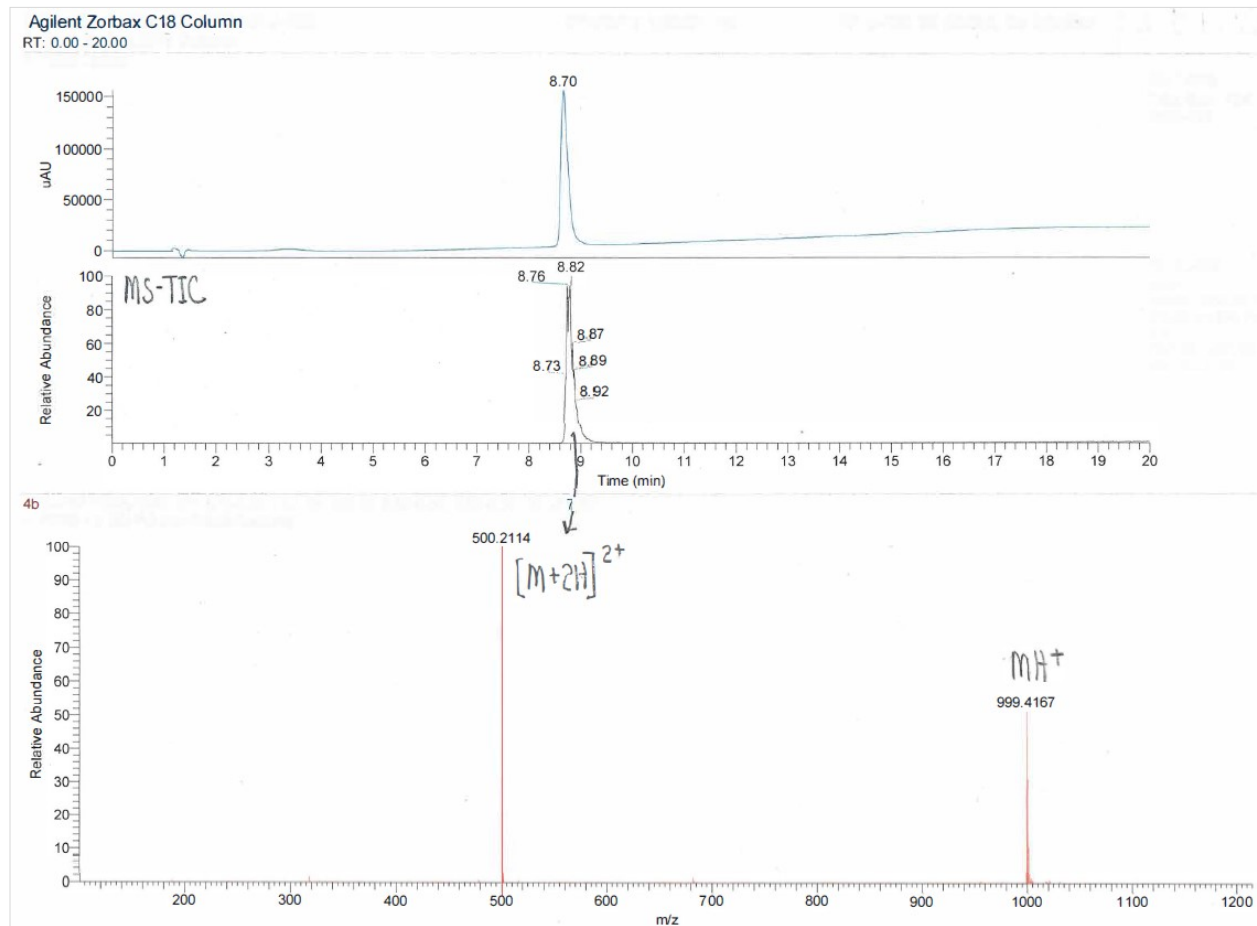

## Compound 4c

HRMS (ESI)  $m/z$  calcd. for  $C_{54}H_{63}N_{10}O_{10}S$  ( $MH^+$ ), 1043.4444; found, 1043.4425. ( $\Delta = 1.8$  ppm).  
HRMS (ESI)  $m/z$  calcd. for  $C_{54}H_{64}N_{10}O_{10}S$  ( $MH_2$ ) $^{2+}$ , 522.2258; found, 522.2243. ( $\Delta = 2.9$  ppm).

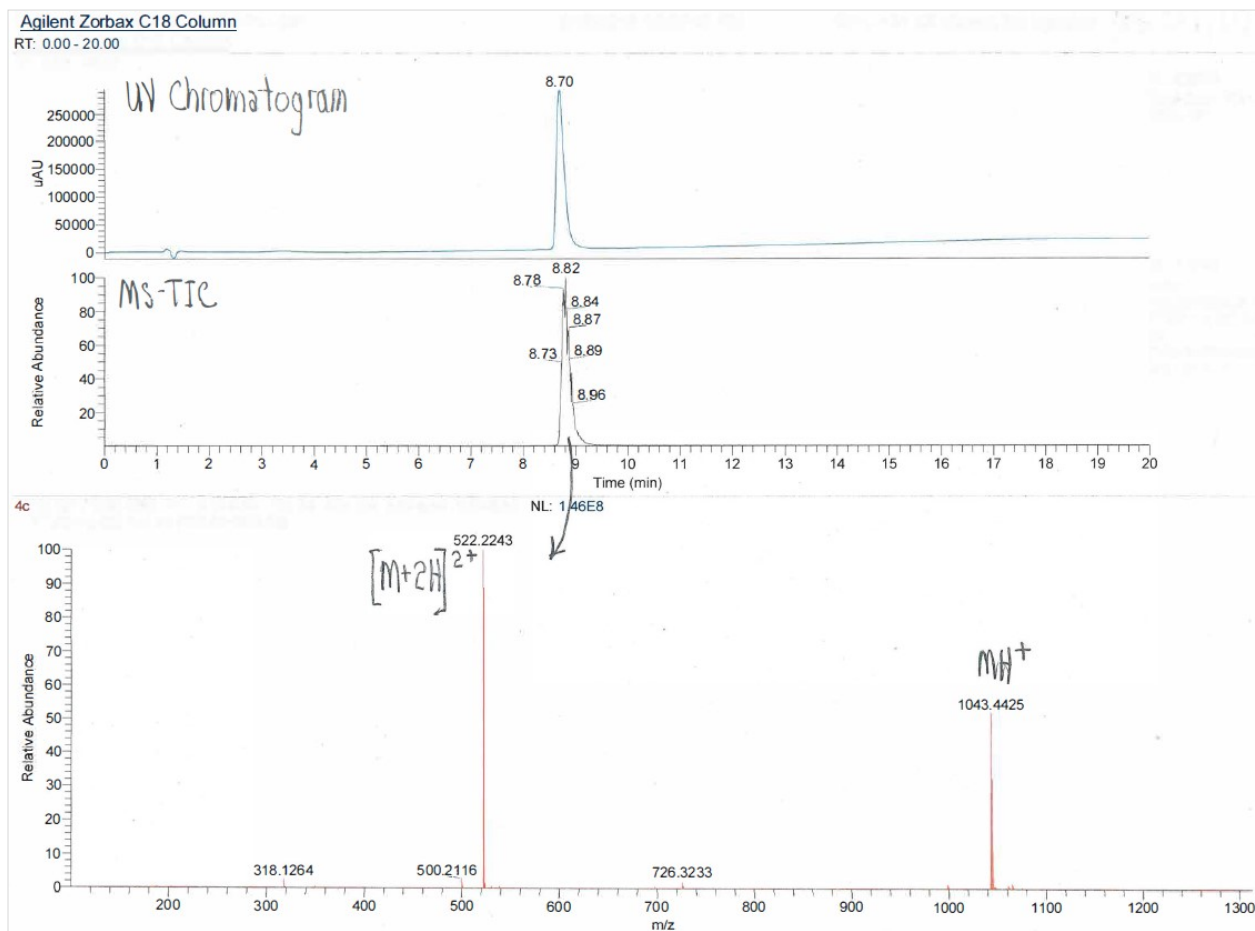

## Compound 4d

HRMS (ESI)  $m/z$  calcd. for  $C_{41}H_{36}N_9O_8$  ( $MH^+$ ), 782.2681; found, 782.2677. ( $\Delta = 0.5$  ppm).

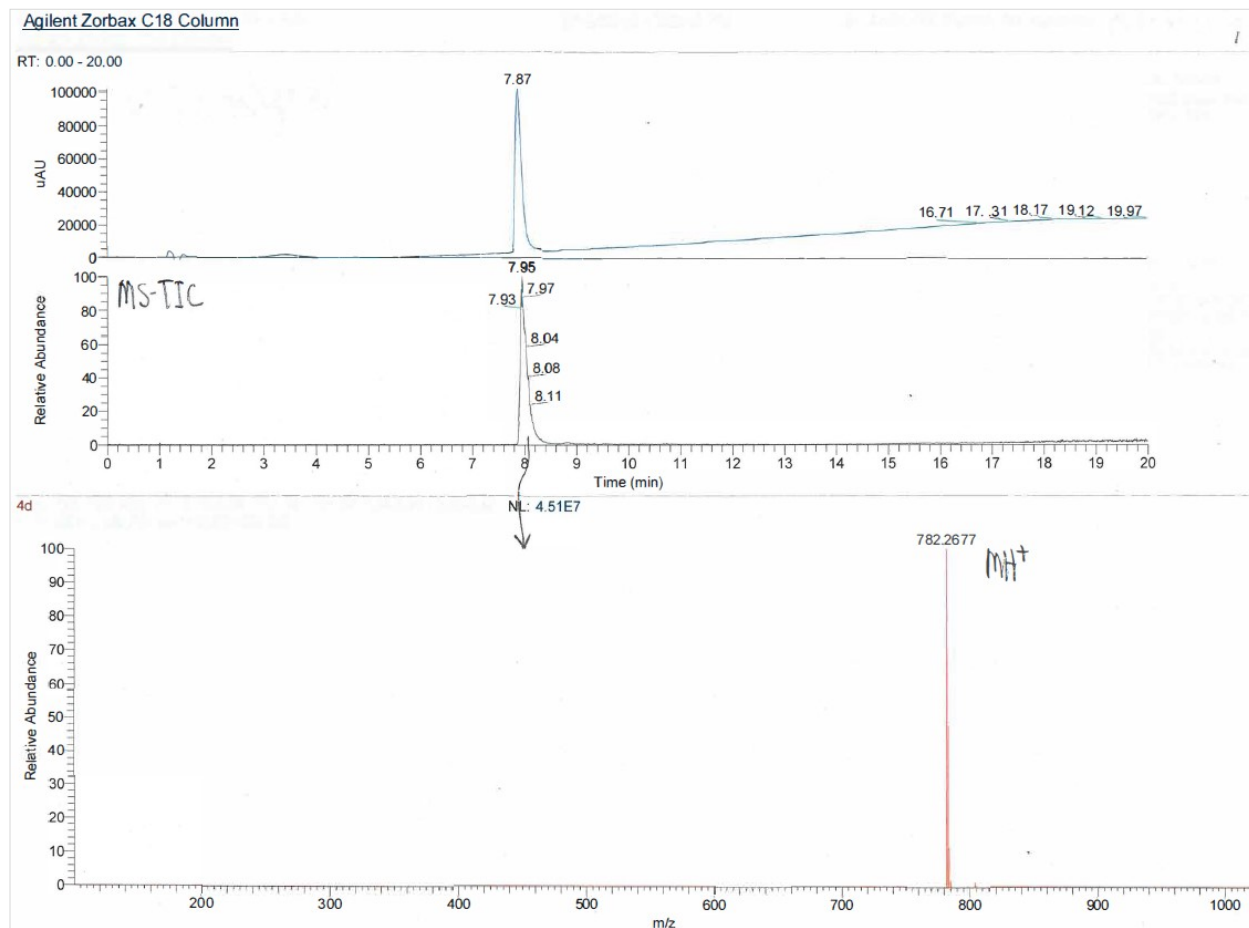



## Compound 5a

HRMS (ESI)  $m/z$  calcd. for  $C_{57}H_{61}N_{10}O_9S$  ( $MH^+$ ), 1061.4338; found, 1061.4331. ( $\Delta = 0.7$  ppm).

HRMS (ESI)  $m/z$  calcd. for  $C_{57}H_{62}N_{10}O_9S$  ( $MH_2$ )<sup>2+</sup>, 531.2205; found, 531.2196. ( $\Delta = 1.7$  ppm).

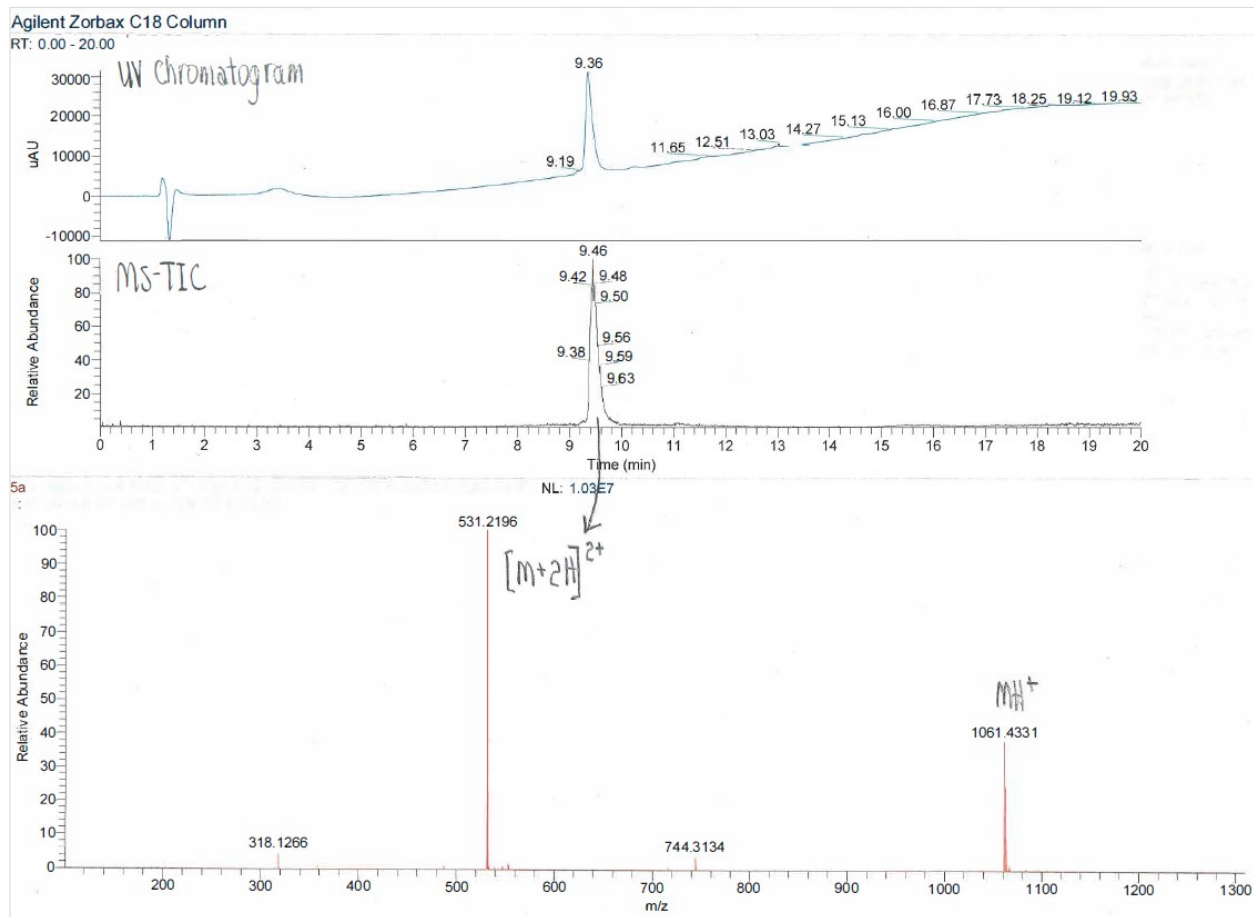

## Compound 5b

HRMS (ESI)  $m/z$  calcd. for  $C_{59}H_{65}N_{10}O_{10}S$  ( $MH^+$ ), 1105.4600; found, 1105.2327. ( $\Delta = 0.9$  ppm).

HRMS (ESI)  $m/z$  calcd. for  $C_{59}H_{66}N_{10}O_{10}S$  ( $MH_2$ ) $^{2+}$ , 553.2337; found, 553.2327. ( $\Delta = 1.8$  ppm).

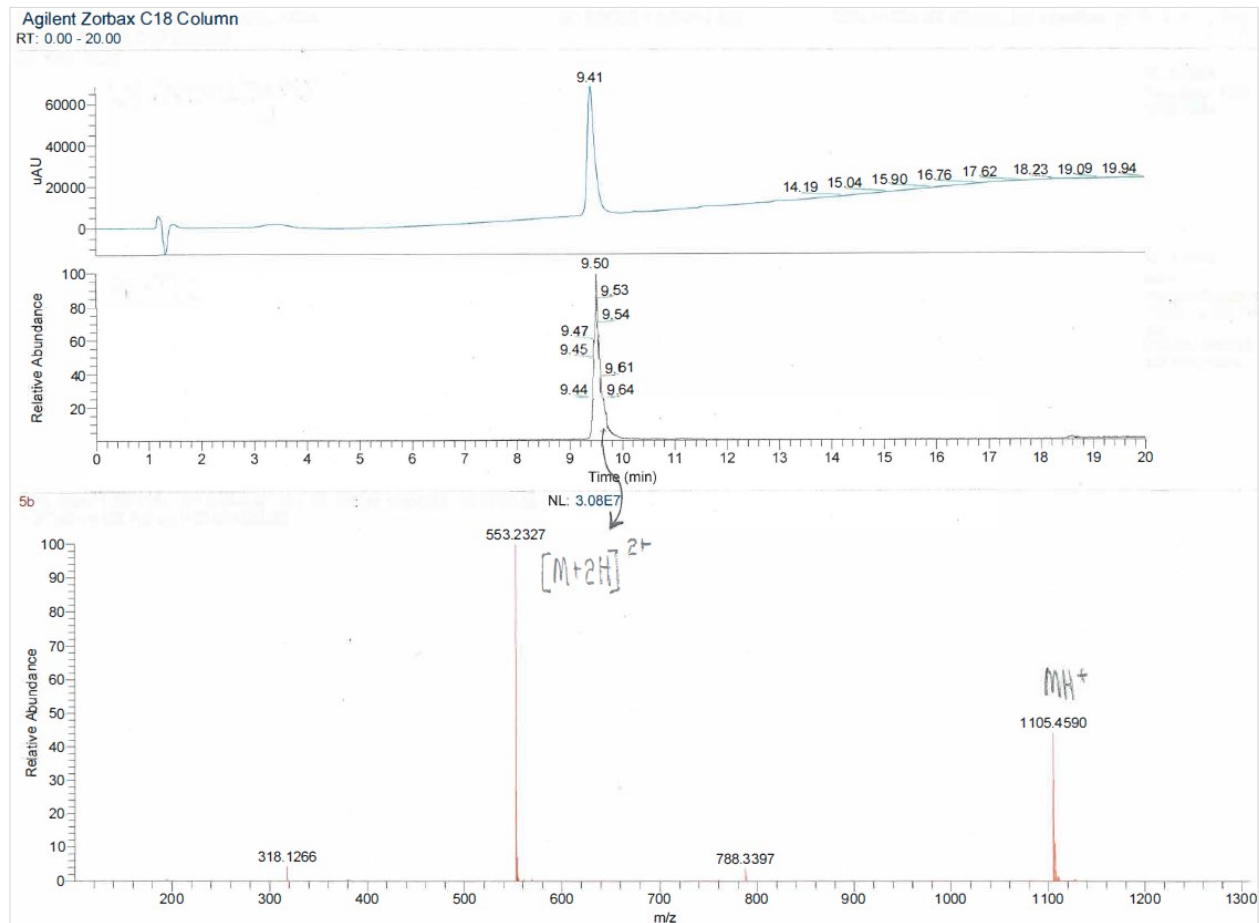

## Compound 5c

HRMS (ESI)  $m/z$  calcd. for  $C_{61}H_{69}N_{10}O_{11}S$  ( $MH^+$ ), 1149.4863; found, 1149.4847. ( $\Delta = 1.4$  ppm).

HRMS (ESI)  $m/z$  calcd. for  $C_{61}H_{70}N_{10}O_{11}S$  ( $MH_2$ )<sup>2+</sup>, 575.2468; found, 575.2457. ( $\Delta = 1.9$  ppm).

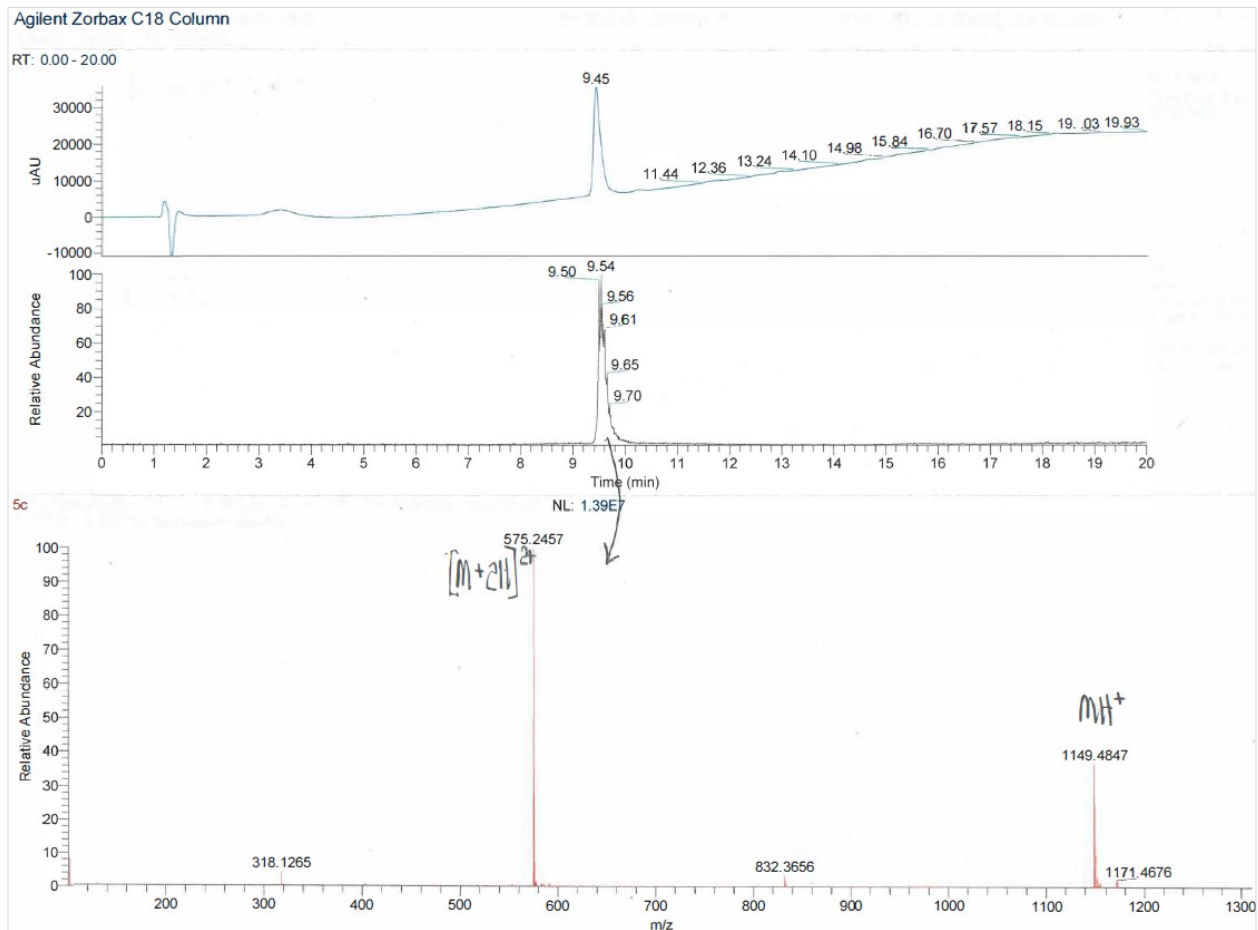

## Compound 5d

HRMS (ESI)  $m/z$  calcd. for  $C_{48}H_{42}N_9O_9$  ( $MH^+$ ), 888.3100; found, 888.3076. ( $\Delta = 2.7$  ppm).

HRMS (ESI)  $m/z$  calcd. for  $C_{48}H_{43}N_9O_9$  ( $MH_2$ ) $^{2+}$ , 444.6586; found, 444.6572. ( $\Delta = 3.1$  ppm).

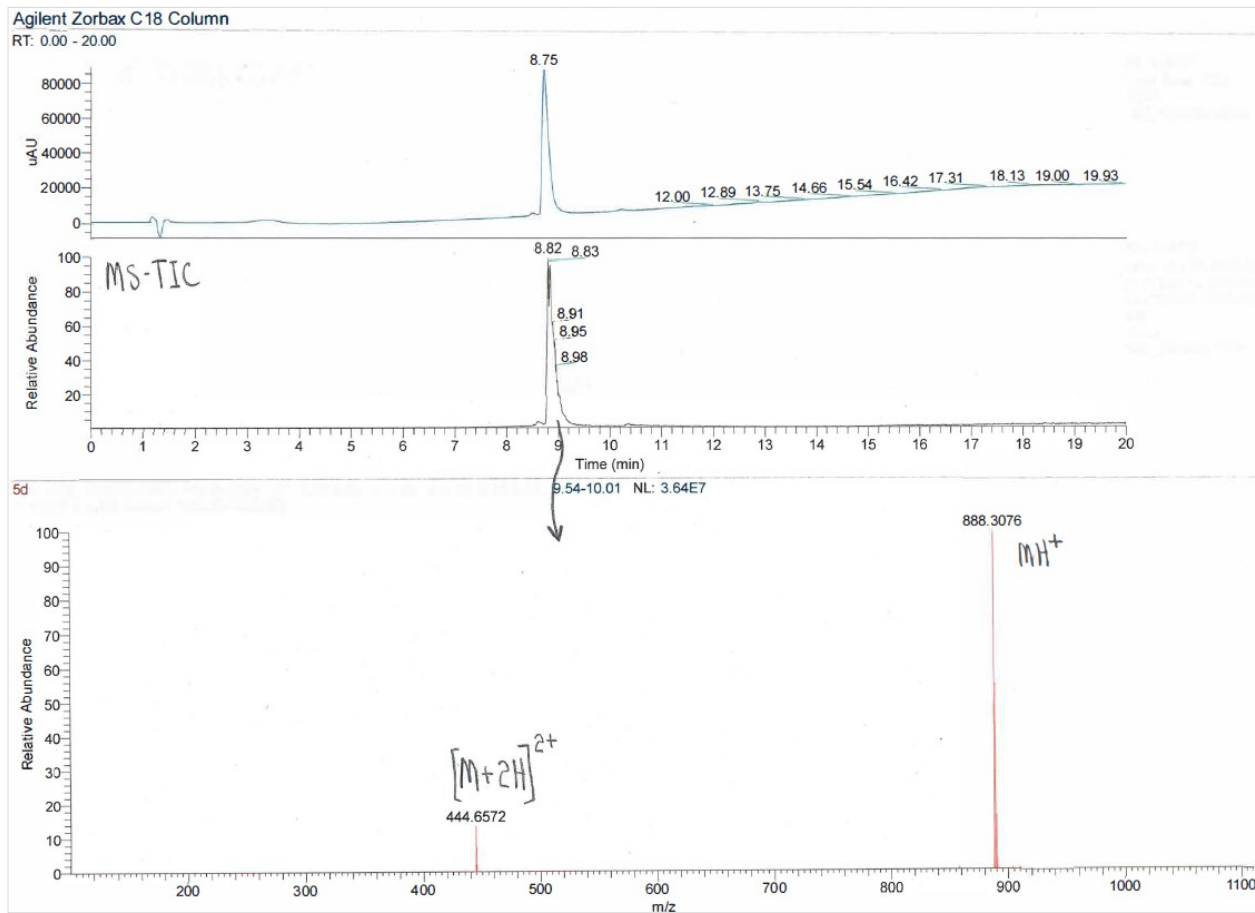

## Compound 5e

HRMS (ESI)  $m/z$  calcd. for  $C_{42}H_{38}N_9O_9$  ( $MH^+$ ), 812.2787; found, 812.2762. ( $\Delta = 3.1$  ppm).

HRMS (ESI)  $m/z$  calcd. for  $C_{42}H_{39}N_9O_9$  ( $MH_2$ ) $^{2+}$ , 406.6430; found, 406.6415. ( $\Delta = 3.7$  ppm).

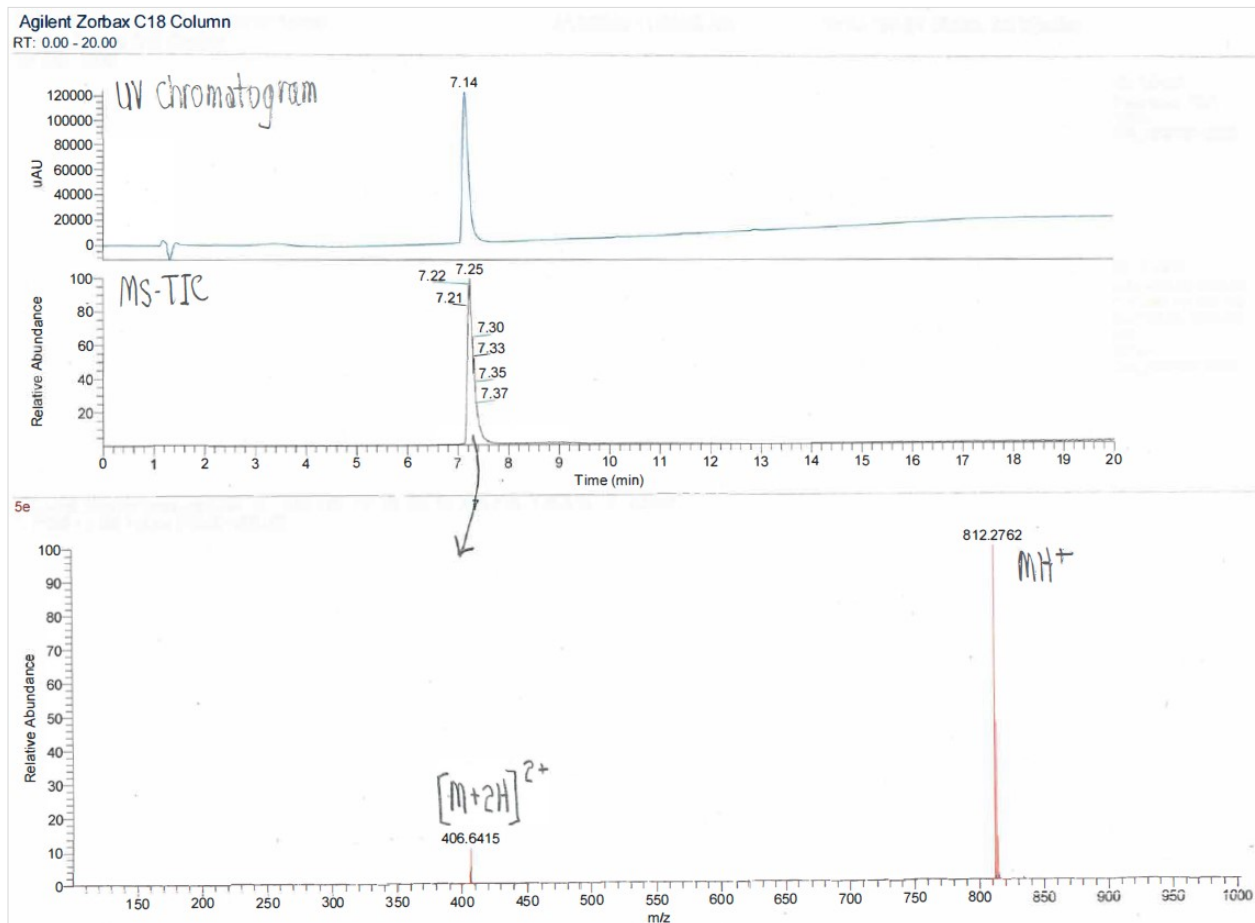

## Compound 5f

HRMS (ESI)  $m/z$  calcd. for  $C_{47}H_{40}N_9O_8$  ( $MH^+$ ), 858.2994; found, 858.2990. ( $\Delta = 0.5$  ppm).

HRMS (ESI)  $m/z$  calcd. for  $C_{47}H_{41}N_9O_8$  ( $MH_2^{2+}$ ), 429.6534; found, 429.6529. ( $\Delta = 1.2$  ppm).

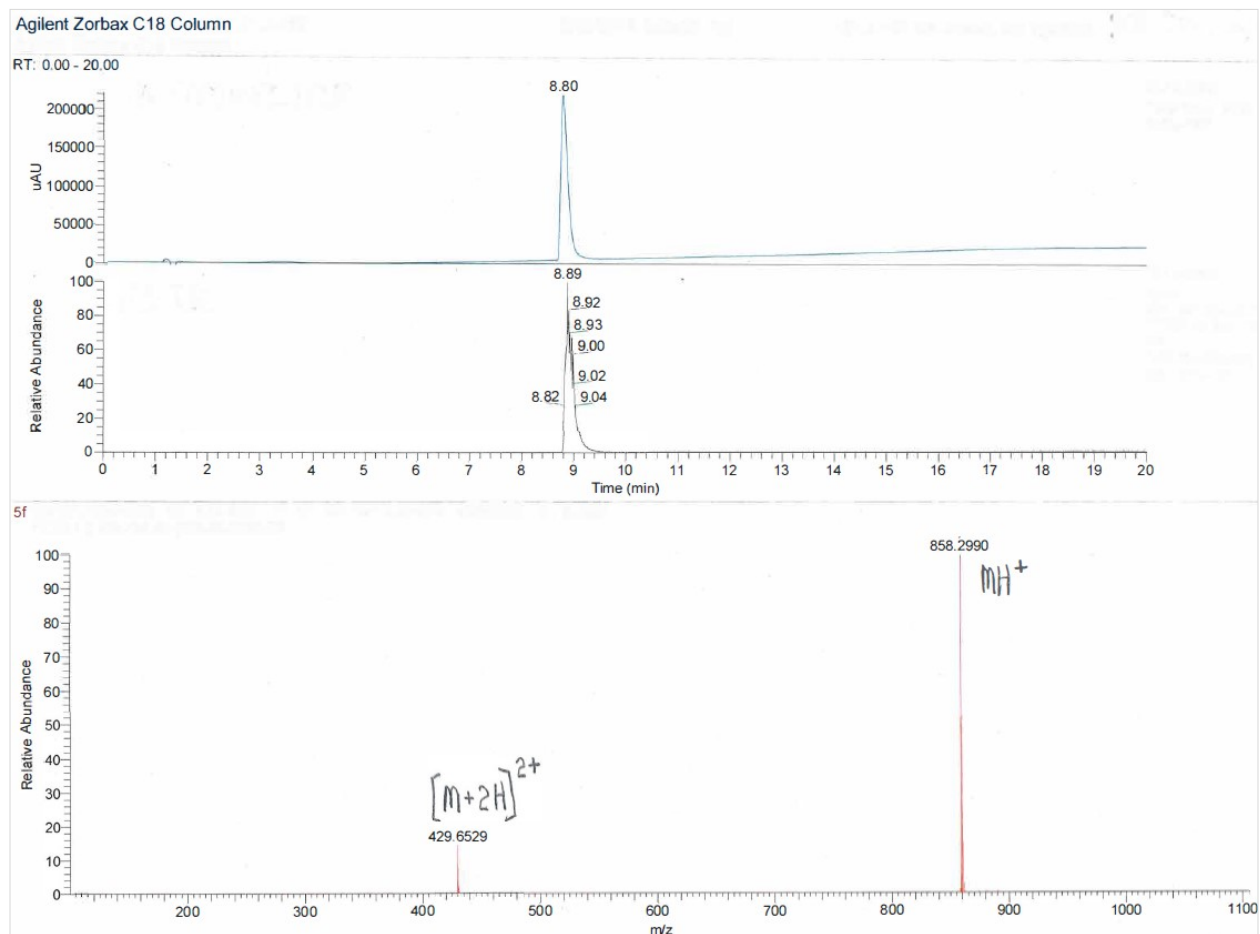

## Compound 5g

HRMS (ESI)  $m/z$  calcd. for  $C_{41}H_{36}N_9O_8$  ( $MH^+$ ), 782.2681; found, 782.2684. ( $\Delta = 0.4$  ppm).

HRMS (ESI)  $m/z$  calcd. for  $C_{41}H_{37}N_9O_9$  ( $MH_2$ ) $^{2+}$ , 391.6377; found, 391.6376. ( $\Delta = 0.3$  ppm).

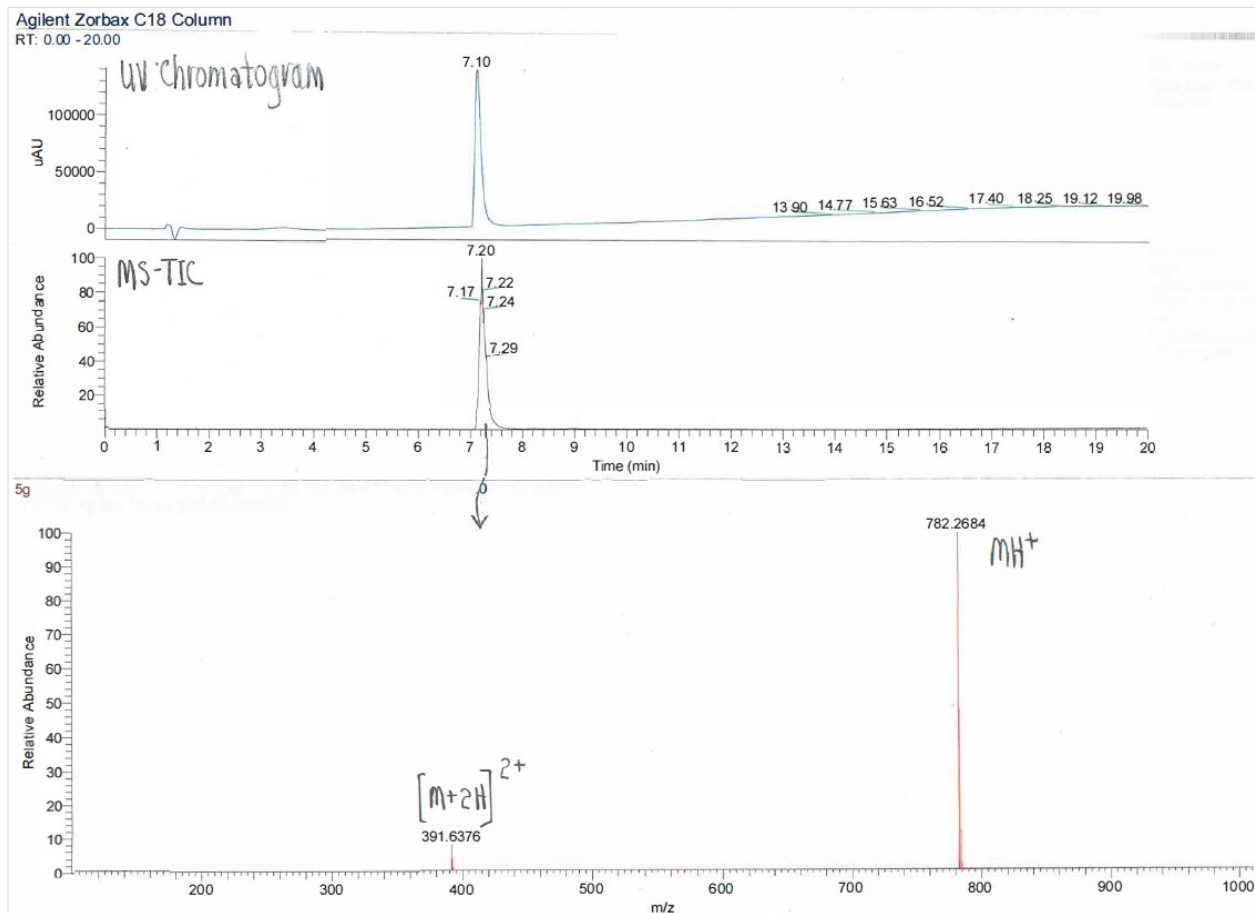

## Compound 5h

HRMS (ESI)  $m/z$  calcd. for  $C_{43}H_{34}N_9O_6$  ( $MH^+$ ), 772.2627; found, 772.2625. ( $\Delta = 0.2$  ppm).

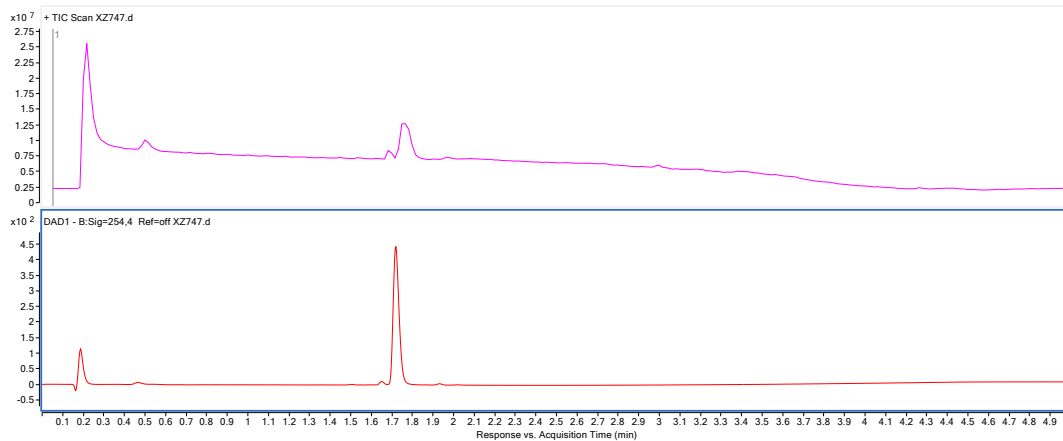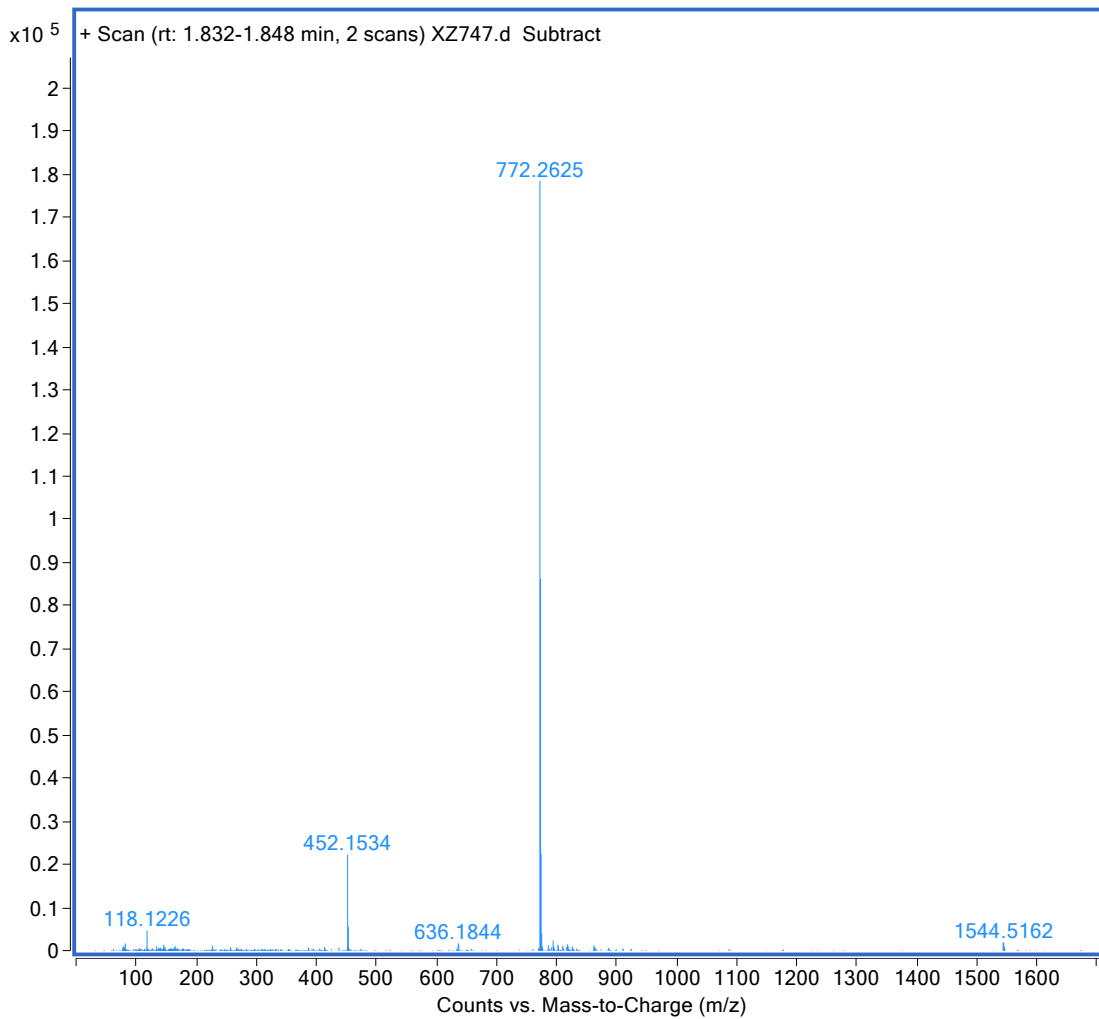



## Compound 5i

HRMS (ESI)  $m/z$  calcd. for  $C_{44}H_{36}N_9O_6$  ( $MH^+$ ), 786.2783; found, 786.2786. ( $\Delta = -0.37$  ppm).

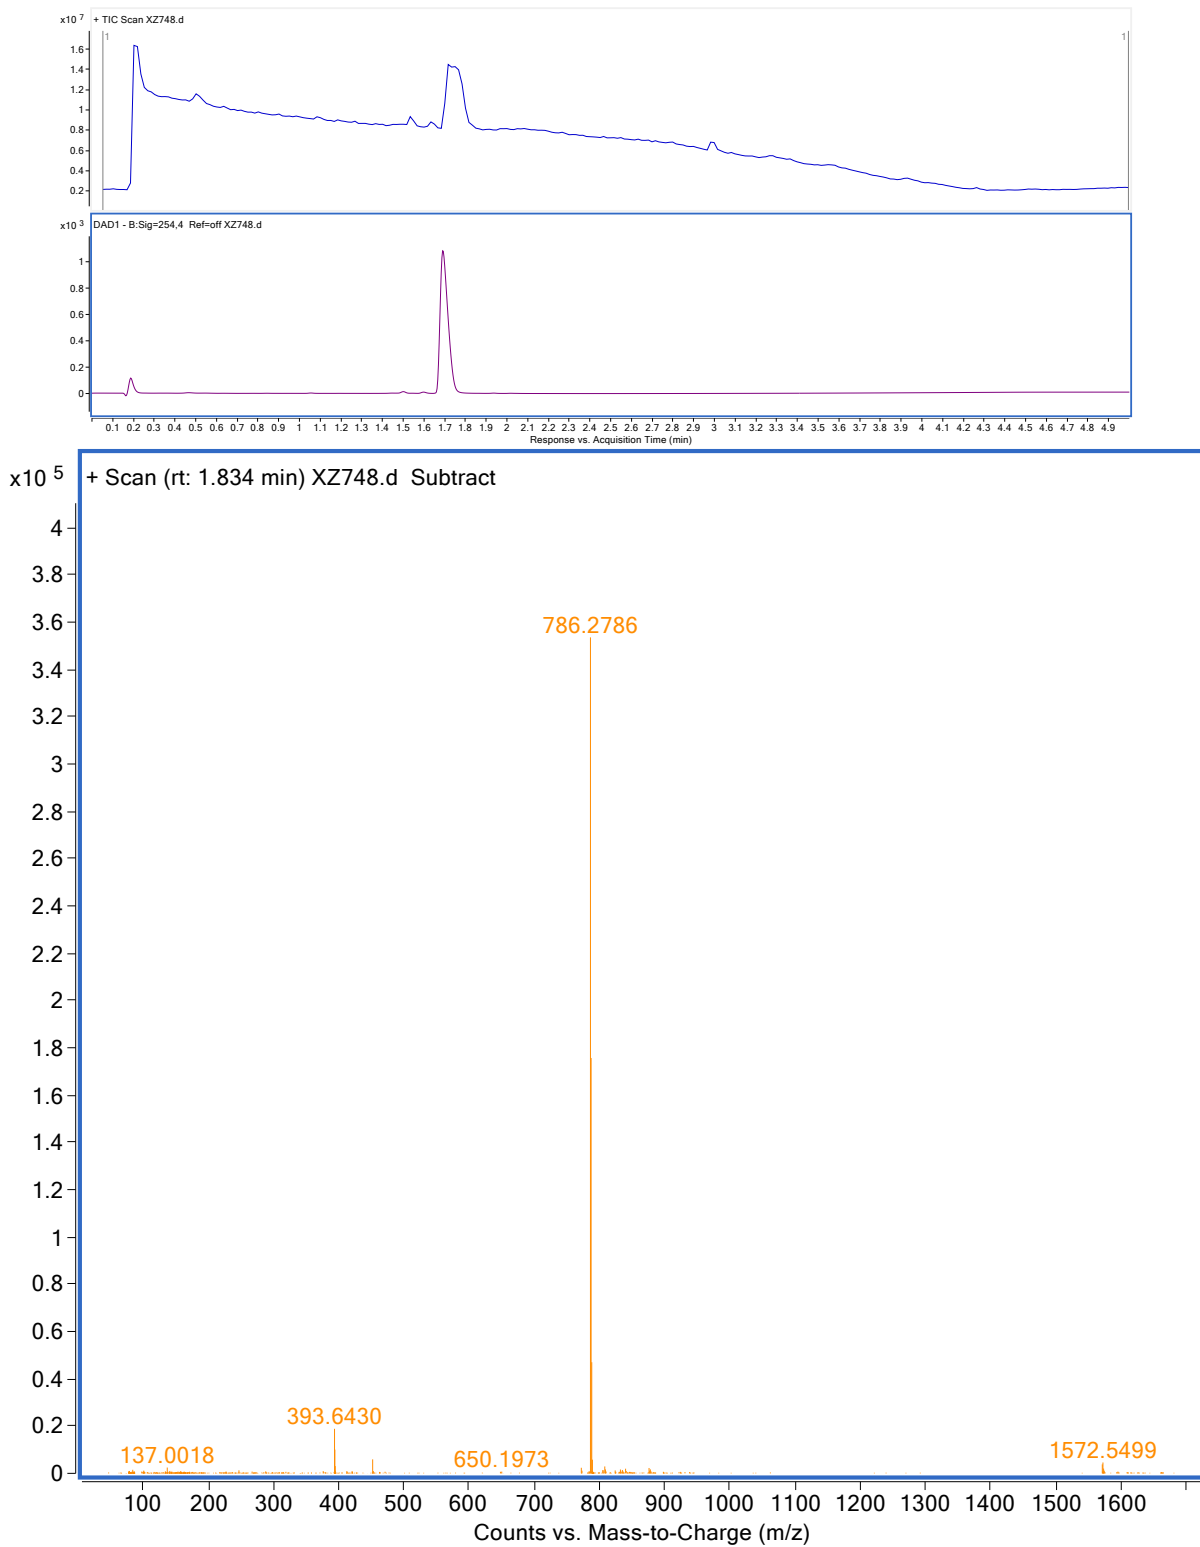

## Compound 5j

HRMS (ESI)  $m/z$  calcd. for  $C_{44}H_{36}N_9O_6$  ( $MH^+$ ), 786.2783; found, 786.2782. ( $\Delta = 0.14$  ppm).

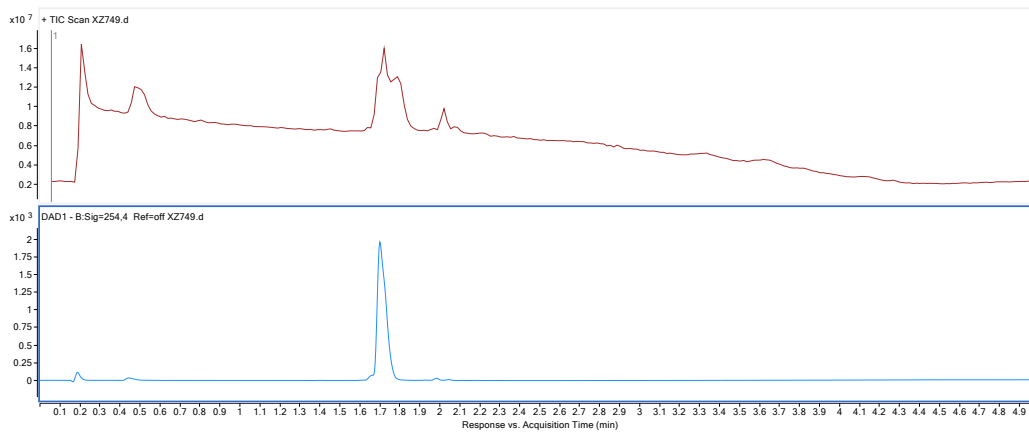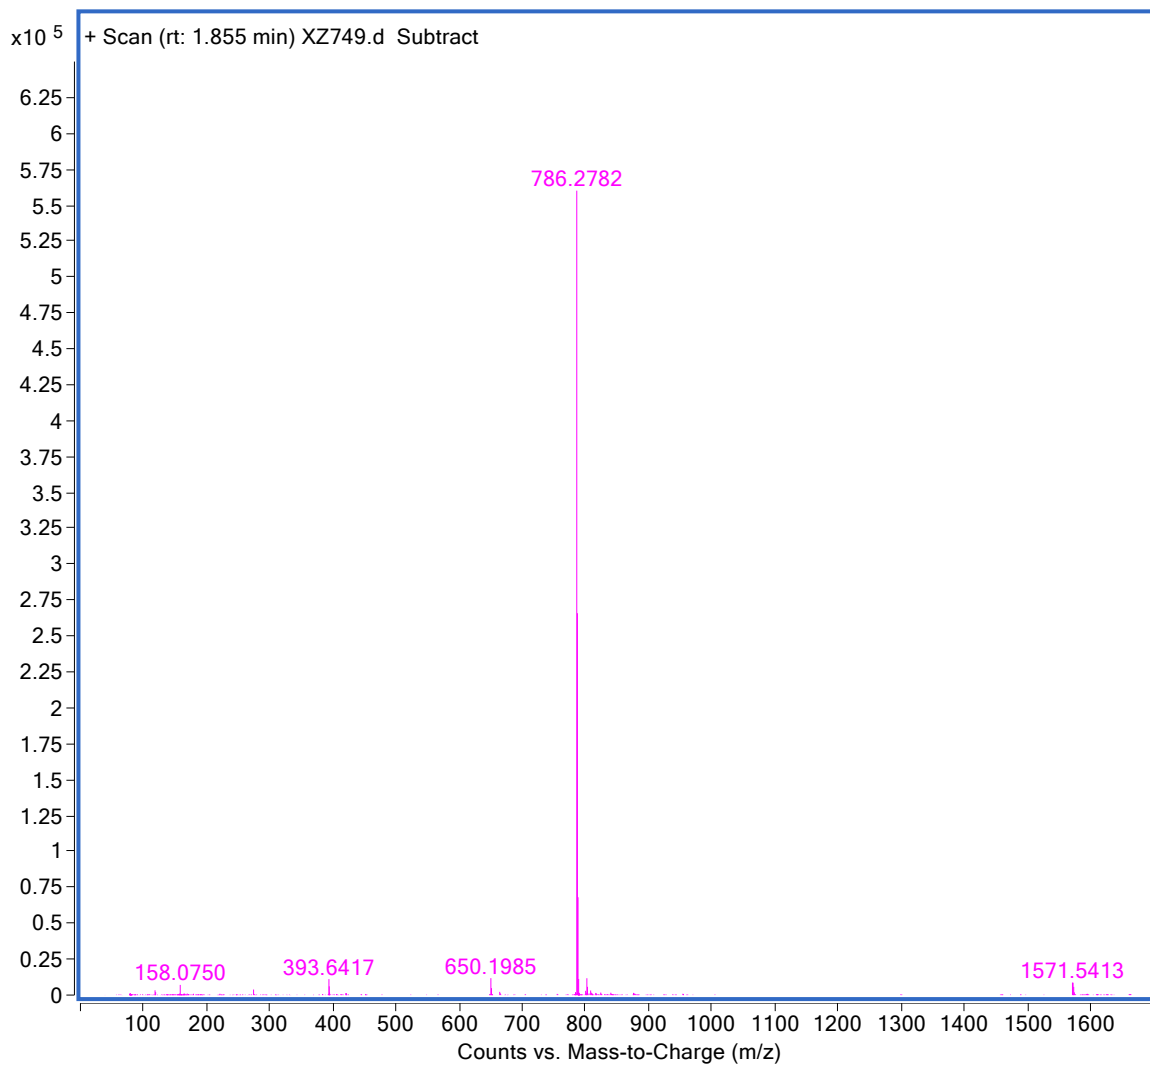

Supplement: d4md00824c1.pdf [file d4md00824c1.pdf]
